# Supplementary material for: Soil water sources and its implications on vegetation restoration in the Three-river Headwaters Region during different ablation periods
Source: Copernicus journal article supplement (doi:10.5194/hess-2023-240), 2023-10-16
Supplement: Supplementary file 1 [file hess-2023-240-supplement.pdf]

Supplements Fig.1 Spatial correlations of soil moisture with air and ground temperatures

Supplements Fig.2 Spatial correlations of soil moisture with precipitation

Supplements Fig.3 Spatial correlations of soil moisture with Evapotranspiration

Supplements Fig.4 Spatial correlations of soil moisture with vegetation index

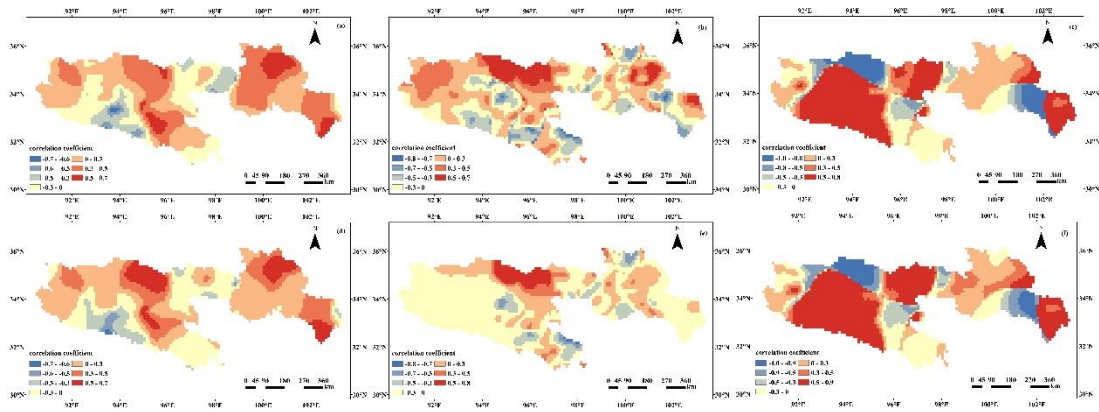

Supplements Fig.1

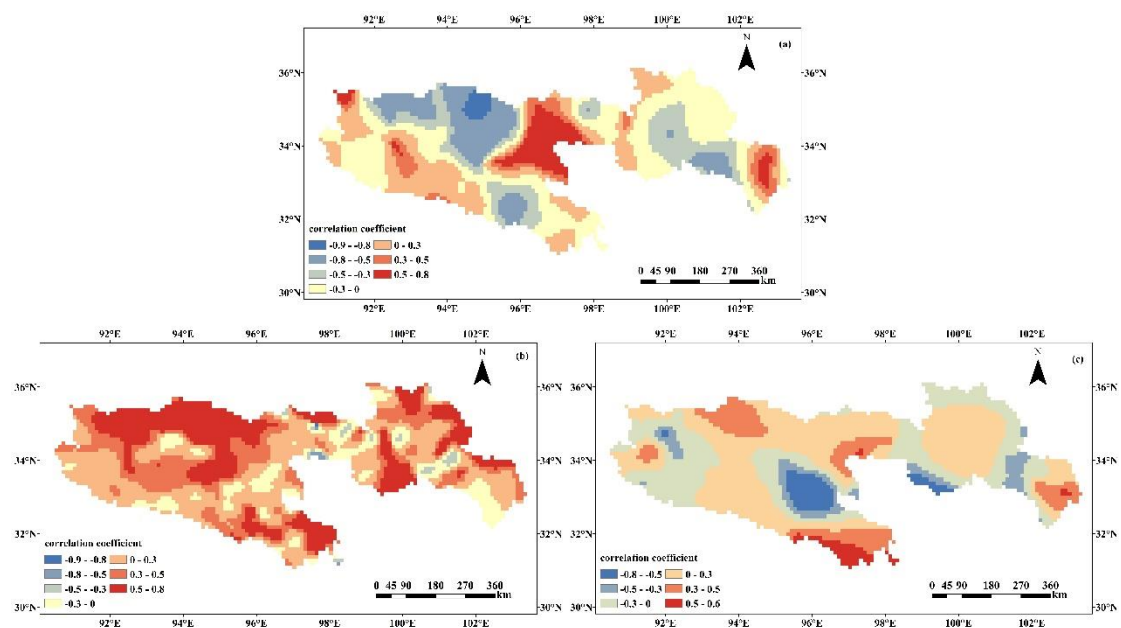

Supplements Fig.2

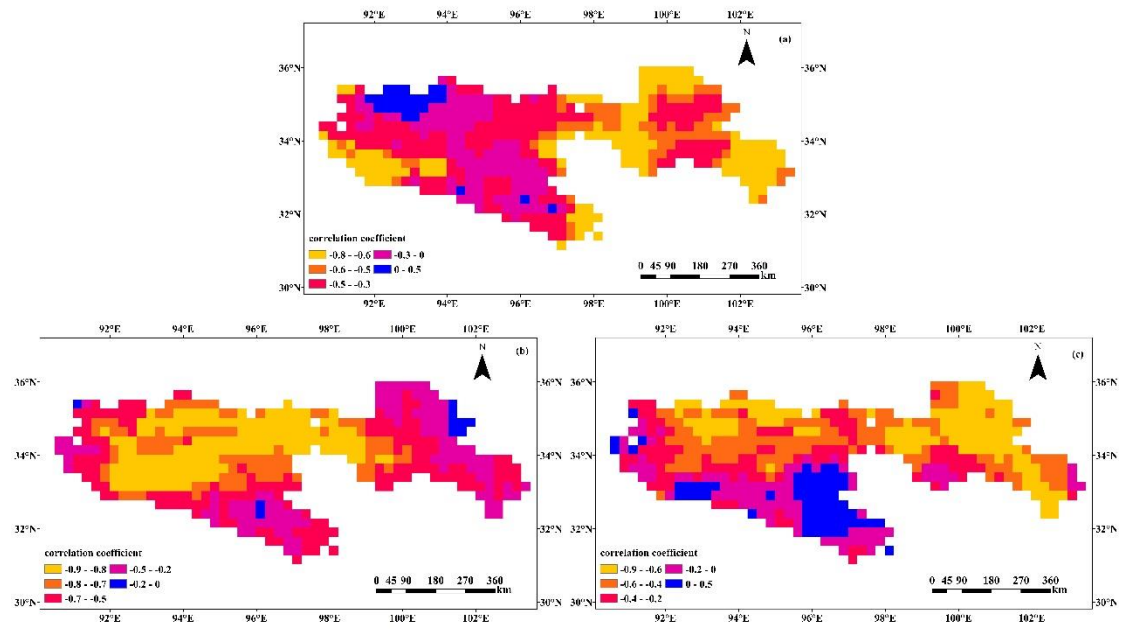

Supplements Fig.3

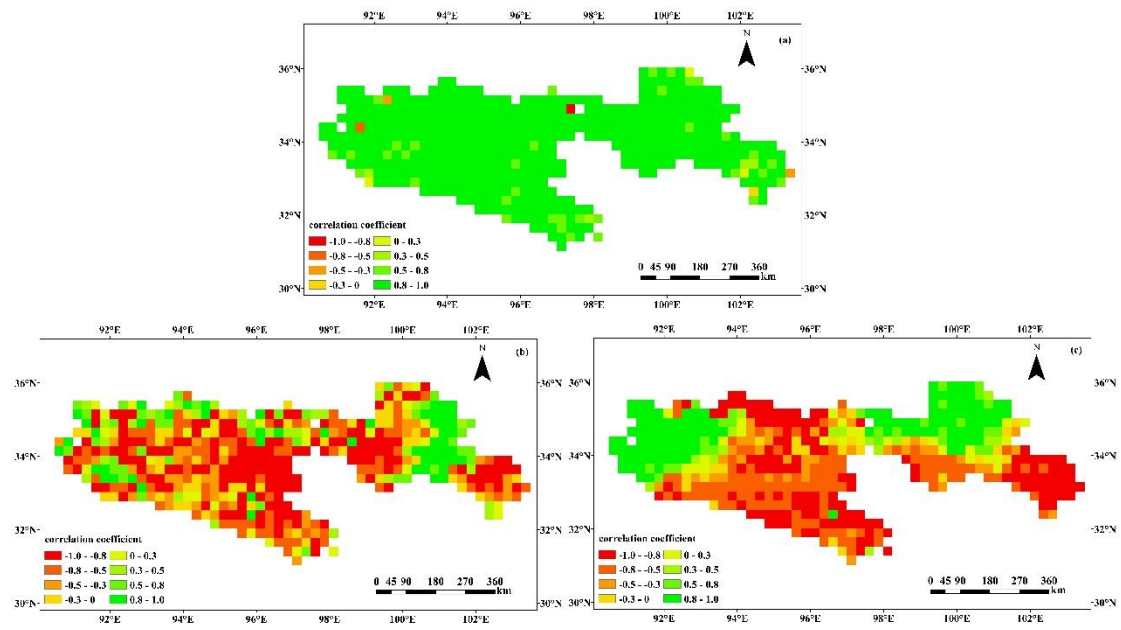

Supplements Fig.4
