# Supplementary material for: Soil water sources and its implications on vegetation restoration in the Three-river Headwaters Region during different ablation periods
Source: Copernicus journal article supplement (doi:10.5194/hess-2023-240), 2023-10-16
Supplement: Supplementary file [file hess-2023-240-RC1-supplement.pdf]

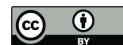

1 **Soil water sources and its implications on vegetation restoration**  
2 **in the Three-river Headwaters Region during different ablation**  
3 **periods**

4 Zongxing Li <sup>1\*</sup>, Juan Gui <sup>1</sup>, Baijuan Zhang <sup>1</sup>

5 Key Laboratory of Ecohydrology of Inland River Basin/Gansu Qilian  
6 Mountains Eco-Environment Research Center/ Observation and Research  
7 Station of Isotope Eco-Hydrology and National Park in Alpine Mountains  
8 Region, Northwest Institute of Eco-Environment and Resources, Chinese  
9 Academy of Sciences, Lanzhou 730000, China

10 \*Corresponding author: Tel: 86+13919887317, E-mail: lizxhhs@163.com  
11 (Zongxing Li).

12 **Abstract:** Under climate warming, effective restoration and protection of  
13 the ecological environment could happen by timely supplementing soil  
14 water. So it is crucial to understand the spatial-temporal changes in soil  
15 water sources. Two thousand six hundred samples of soil water,  
16 precipitation, river water, ground ice, supra-permafrost water, and glacier  
17 snow meltwater have been collected from June, August, and September  
18 2020 to quantify the soil water sources in the Three-River Headwater  
19 Region under different ablation periods. Results indicated that  
20 precipitation, ground ice, and snow meltwater accounted for approximately  
21 72%, 20%, and 8% of soil water during the early ablation period. Snow is



22 completely melted in the heavy and the end of the ablation period, and  
23 precipitation contributed to about 90% and 94% of soil water, respectively.  
24 These recharges also vary markedly with altitude and vegetation type.  
25 Various factors influence soil water sources, including temperature,  
26 precipitation, vegetation, evapotranspiration, and the freeze-thaw cycle.  
27 However, soil water loss will further exacerbate vegetation degradation  
28 and pose a significant threat to the ecological security of the “Chinese  
29 water tower.” So there is an urgent need to monitor soil water, warn of  
30 vegetation degradation associated with soil moisture loss, and identify  
31 reasonable water-soil conservation and vegetation restoration patterns.

32 **Keywords:** soil water sources, precipitation, ground ice, three-River  
33 Headwater Region

34

## 35 **1. Introduction**

36 Soil water is a vital water resource, a link between precipitation, surface  
37 water, soil water, and groundwater, which is an essential component in the  
38 formation, transformation, and consumption of water resources with  
39 spatial-temporal scales. It substantially impacts regional water resource  
40 distribution patterns, the ecological environment, and river runoff as the  
41 key factors in terrestrial hydrological cycles and environmental succession  
42 (Gao et al., 2017; Sazibet al., 2020). Soil water plays a fundamental role in  
43 controlling the exchange of water and heat between the land surface and

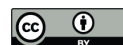

44 atmosphere, which has been widely applied to study the regional  
45 microclimate, energy and material balance, and global climate change  
46 (Spennemann et al., 2017; Sprenger, Tetzlaff, & Soulsby, 2017). Moreover,  
47 soil water is directly involved in physiological activities and promotes  
48 productivity and carbon sequestration capacity. It was sensitive to the  
49 interaction between soil and vegetation that altered soil physicochemical  
50 properties, internal structures, and material composition (Marchionni et al.,  
51 2021). Consequently, soil water sources can be affected by many factors,  
52 such as climate, vegetation, soil type, and topography (Martinez Garcia et  
53 al., 2014). Understanding the spatial-temporal changes in soil water  
54 sources is essential for better projection of the water and ecology. So,  
55 studying soil water sources is a hot topic in international hydrology and  
56 soil science.

57 Research on soil water has progressed in a series of studies related to  
58 the hydrometeorological, hydro-climatological, ecological, and  
59 biogeochemical processes. Permafrost existence can affect inter-annual  
60 changes in soil water, and its degradation, including the increasing active  
61 layer thickness and disappearance, would decrease ecosystem resilience  
62 (Liu et al., 2021). At high latitudes, active-layer deepening associated with  
63 soil water changes occurred over less than 8% of the current permafrost  
64 area under climate warming (Zachary et al., 2013). Soil water modulates  
65 regional climate from sub-seasonal to seasonal timescales. Zhang et al.

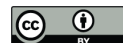

66 (2020) found that drier soil led to a more significant increase in the upper  
67 quantile of summer heatwaves frequency than in the lower quantile. Liu et  
68 al. (2014) thought wet (dry) initial soil water anomalies reduce (amplify)  
69 the drought extremes, diminish (reinforce) the hot extremes, and enhance  
70 (reduce) the cold extremes over areas of strong soil water-atmosphere  
71 coupling. Qi et al. (2020) found that soil water could decrease by at least  
72 20% in March-May if there is no snow. Alexander (2021) also found that  
73 despite the high humidity in autumn and the high snow reserves  
74 accumulated during winter, soil water decreased after the snow had melted.  
75 The soil water movement is an important carrier of the material cycle and  
76 energy flow. The horizontal flow weakens in the freezing period due to the  
77 terrain slope and the freezing-thawing cycle, whereas the vertical migration  
78 of soil water moves and strengthens (Cao et al., 2017). Zhang et al. (2021)  
79 investigated the water movement in reconstructed soil and evaluated the  
80 effects of mining waste rock on plant growth in an arid-cold region. The  
81 interaction between soil water and the ground thaw was more dependent at  
82 wetter sites, and the interactive soil water and thaw depth behavior on hill  
83 slopes changed with location (Guan et al., 2010). Inter-annual anomalies  
84 of soil water and vegetation due to rainfall during a given summer were  
85 maintained through the freezing winter to the spring, acting as an initial  
86 condition for subsequent summer land-surface and rainfall conditions  
87 (Masato and Banzragch, 2011). Based on the observation in the central



88 Tibetan Plateau, the four GLDAS models tend to systematically  
89 underestimate the surface soil water (0-5 cm) while well simulated the soil  
90 water for the 20-40 cm layer, especially during the soil thawing period  
91 (Chen et al., 2013; Li et al., 2019). The vegetation effect and the freezing-  
92 thawing cycle may be the significant factors that led to an unsatisfactory  
93 performance of the Soil Moisture Active Passive (SMAP) mission  
94 (Wagner et al., 2003; Ma et al., 2017). As mentioned above, the  
95 quantification of soil water sources is relatively insufficient.

96 Soil water has also been deeply concerned in TRHR. Cao and Jin  
97 (2021) analyzed the distribution characteristics of soil water and its  
98 relationship with temperature and precipitation in TRHR. The influence of  
99 precipitation on soil water in the alpine steppe was greater than that in an  
100 alpine meadow, especially in lower-altitude areas (Li et al., 2022). Chen et  
101 al. (2021) constructed the spatial-temporal changes in soil water and its  
102 influencing factors from 2003 to 2020. Huang et al. (2022) studied the  
103 variation of surface soil water in an alpine meadow with different  
104 degradation degrees in the study region. Xing et al. (2016) analyzed the  
105 groundwater storage changes and their influence on soil water in the TRHR.  
106 Guo et al. (2022) thought the main factors influencing soil water changes  
107 were NDVI and precipitation, followed by air temperature and wind speed  
108 in the sources region of the Yellow river. Land degradation significantly  
109 reduced soil water by 4.5-6.1% at a depth of 0-100 cm and increased the



110 annual mean soil surface temperature by 0.8 °C under climate warming in  
111 the sources region of the Yangtze river (Xue et al., 2017). Soil water and  
112 temperature showed decreasing trends from 0-80 cm and an increasing  
113 trend from 80-100 cm (Li et al.,2020). The change of soil water resulted in  
114 vegetation degeneration, soil desertification, and leanness in the source  
115 regions of the Yangtze River (Wang et al., 2012), and it also had a positive  
116 correlation with the average thickness of wind deposition (Song et al.,  
117 2019). The TRHR is undergoing a glacier retreat, permafrost degradation,  
118 precipitation increase, snowfall decrease, water conservation decrease, and  
119 soil erosion intensification under climate warming (Li et al., 2021). These  
120 changes have caused large fluctuations of soil water, bringing great  
121 uncertainty to vegetation growth and causing challenges in vegetation  
122 restoration. So there is an urgent need to quantify the soil water sources to  
123 improve the effectiveness of ecological restoration in permafrost regions.

124 However, the field observations are too sparse to satisfy the need for  
125 quantifying soil water sources in TRHR. As the natural tracers, stable  
126 isotopes can be applied in water cycle studies to trace precipitation, soil  
127 water, groundwater, and plant water (Zhang et al., 2017; Wang et al., 2018;  
128 Yang et al., 2019; Li et al., 2022). Monitoring the stable isotope  
129 characteristics of soil water could provide information about water sources,  
130 changes in soil water, and moisture cycling (Sprenger et al., 2017). So  
131 based on 2600 samples of soil water, precipitation, river water, ground ice,



132 supra-permafrost water, and glacier snow meltwater collected from June,  
133 August, and September 2020, this study (a) analyzes the spatiotemporal  
134 distribution of  $\delta^2\text{H}$  and  $\delta^{18}\text{O}$  in soil water at different ablation stages; (b)  
135 discusses the hydrological processes of soil water and its differences; (c)  
136 quantifies the major sources and its contributions to soil water; (d)  
137 confirms the corresponding implications for ecological protection. The  
138 result presents new observational evidence of soil water sources in the  
139 “Chinese Water Tower.” It provides a scientific basis for establishing a  
140 complex interplay between soil water and vegetation as a theoretical basis  
141 for developing water-soil conservation and vegetation restoration patterns  
142 in cold regions, especially in the permafrost region.

143

## 144 **2. Data and methods**

### 145 **2.1 Study region**

146 Three-River Headwater Region (TRHR) ( $31^{\circ}39'-36^{\circ}12'N$ ,  $89^{\circ}45'-$   
147  $102^{\circ}23'E$ , 2610-6920m a.s.l.) is the source region of Yangtze (YZR),  
148 Yellow (YLR), and Lancangjiang Rivers (LCR), which is significant to  
149 freshwater resources in China and Asia (Fig.1). The TRHR is  $36.3 \times 10^4 \text{ km}^2$   
150 and accounts approximately 50.4% of the total area of the Qinghai  
151 Province. The region has a plateau continental climate with an annual  
152 average temperature of  $-5.38-4.14^{\circ}\text{C}$  and annual precipitation of 262.2-  
153 772.8 mm (Cao and Pan, 2014). The radiation is abundant, with total



154 annual sunlight as high as 2300-2900 h due to the high altitude. The  
155 permafrost is extensively developed and is well distributed in the YZR with  
156 a depth averaging between 50 and 120 m, whereas permafrost was  
157 discontinuous and sporadic with a depth below 50 m in the YLR and LCR  
158 (Zhang et al., 2001b). The YLR, YZR, and LCR cover 167,000 km<sup>2</sup>,  
159 159,000 km<sup>2</sup>, and 37,000 km<sup>2</sup>, accounting for 46%, 44%, and 10% of the  
160 total area of TRHR, respectively. The YLR, YZR, and LCR contribute  
161 approximately 49%, 25%, and 15% of the total runoff and supply up to 600  
162 × 10<sup>8</sup> m<sup>3</sup>/a freshwater resources. Additionally, more than 180 rivers, 1800  
163 lakes, 2000 × 10<sup>8</sup> m<sup>3</sup> of glaciers, and 73,300 km<sup>2</sup> of wetlands are present  
164 in the TRHR. Protecting the ecology of the TRHR, maintaining and  
165 improving its function of water-soil conservation, and water containment  
166 are of vital importance to the stable supply of water resources, as well as  
167 to climate stability, ecological security, and sustainable economic and  
168 social development in Asia. The first largest national park, the Three-River  
169 Headwaters National Park, has been built, a restorative practice region for  
170 constructing ecological civilization and beautifying China.

171 Grasslands are the main ecosystems and comprise approximately 70%  
172 of the regional vegetation area. The grasses are typical for alpine meadows  
173 and alpine steppes, dominated by *Kobresia capillifolia*, *Kobresia humilis*,  
174 *Stipa purpurea*, *Elymus dahuricus*, etc. Other vegetation types are  
175 temperate steppe and alpine desert with small distributions, dominated by





176 *Stipa spp.*, *Achnatherum splendens*, *Carex spp.*, and *Thylacospermum*  
177 *caespitosum*, *Androsace tapete*, *Oxytropis sp.*, *Saussurea subulata*,  
178 respectively (Fan et al., 2010). Moreover, the ecosystems in the TRHR are  
179 characterized by diversity, fragility, sensitivity, weak carrying capacity, and  
180 restoration capacity. Most of the soils are thin in thickness and coarse in  
181 texture. From high altitude to low altitude, the soil types are alpine desert  
182 soil, alpine meadow soil, alpine steppe soil, mountain meadow soil, grey-  
183 cinnamon soil, castanozems, and mountain forest soil, respectively. The  
184 alpine meadow soil is the primary soil type in the region, and other  
185 intrazonal soils are also commonly developed.

## 186 **2. 2 Data and methods**

### 187 **2.2.1 Samples: collection and preparation**

188 Primary data was collected through fieldwork in June, August, and  
189 September 2020. It was used to explore the seasonal pattern and its  
190 influence on soil-water sources. A scientific understanding of vegetation  
191 restoration in the “Chinese Water Tower” (Fig.2) was developed from these  
192 soil-water sources. A total collection of 2600 samples includes soil water,  
193 ground ice, precipitation, river water, supra-permafrost water, and glacier  
194 snow meltwater in the ~~Three-river-Headwaters-Region~~, with spatial and  
195 temporal frequency (Fig.3). The sampling details are described in the  
196 following sections.

197 **Soil samples:** The soil profile was excavated, and its thickness can be

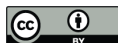

198 determined based on the actual thickness of the soil layer, and the samples  
199 were collected at 20 cm intervals from 79, 70, and 93 sampling sites in  
200 June, August, and September, respectively (Fig.3). Meanwhile, soil  
201 temperature was measured in °C, and the test range was from -40 °C to  
202 100°C, with a  $\pm 0.5^\circ\text{C}$  accuracy. Soil moisture was measured as a %  
203 ( $\text{m}^3/\text{m}^3$ ), with a test range of 0 to 100% and a response time of less than 2s.  
204 Three parallel samples were collected from each layer for soil water stable  
205 isotope analysis. The samples were collected from 2 cm below the surface  
206 to avoid the soil samples being influenced by the free atmosphere. ~~Seven~~  
207 ~~hundred forty one~~ soil samples were collected and stored in HDPE bottles  
208 and sealed with parafilm.

209 **Precipitation samples:** At Zhimenda (92.26°E, 34.14°N, 3540 m),  
210 Tuotuohe (34.22°N, 92.24°E, 4533 m), Zaduo (32.53°N, 95.17°E, 4066.4  
211 m), Dari (33.45°N, 99.39°E, 3967 m) and Maduo (34.55°N, 98.13°E,  
212 4272.3 m) stations, a total of 375 precipitation event-scale samples were  
213 collected during from June 2019 to July 2020 in TRHR (Fig.3). All  
214 precipitation occurring from 20:00 on the first day to 20:00 the next day  
215 was collected from sampling the precipitation event. During sample  
216 collection, precipitation, air temperature, wind speed, and relative humidity  
217 were recorded at the corresponding national meteorological stations. In  
218 order to avoid evaporation, the sample was collected immediately after the



219 event.

220 **Ground ice:** In order to collect the ground ice samples, a 1 m deep soil  
221 profile of the active permafrost layer was dug at each of the sampling sites,  
222 to look for permafrost ground ice (Fig.3). ~~The~~ 66, 40, and 37 ground ice  
223 samples have been obtained on June, August, and September, respectively,  
224 in the TRHR, which were preserved in pre-cleaned HDPE bottles sealed  
225 with parafilm and kept frozen. The outer layer of each ice sample was  
226 chipped off to avoid contamination from the soil.

227 **River water:** The river water has also been collected in TRHR,  
228 including 259, 231, and 186 samples in June, August, and September,  
229 respectively, to analyze the spatial and temporal relationship between soil  
230 and river water. River water samples were collected 20 cm below the river  
231 surface and stored in HDPE bottles sealed with parafilm.

232 **Supra-permafrost water:** Supra-permafrost water is mainly stored  
233 in the active permafrost layer (Li et al., 2020). To study the hydraulic  
234 connection between supra-permafrost water and soil water, 125, 161 and  
235 130 samples were collected at different altitudes during June, August, and  
236 September of 2020, respectively. First, a 1-m deep profile of the active  
237 permafrost layer was manually dug at each sampling site. Second, the  
238 collected water samples were immediately filtered with a 0.45- $\mu$ m  
239 millipore filtration membrane at the bottom of each profile, and then stored  
240 in HDPE bottles and sealed with parafilm.



241           **Glaciers snow meltwater:** At Jianggudiru Glacier (91°E,33.45°N,  
242 5281 m), Dongkemadi Glacier (92°E, 33°N, 5423 m), and Yuzhufeng  
243 Glacier (94.22°E, 35.63°N, 5180 m) in the sources region of Yangtze river  
244 (Fig. 1), and Halong glacier (99.78°E, 34.62°N, 5050 m) in the sources  
245 region of Yellow river, and Yangzigou glacier (94.85°E, 33.46°N, 5260 m)  
246 in the sources region of Lancangjiang river, 27, 32 and 41 samples were  
247 collected from streams flowing out of the glacier front during June, August  
248 and September of 2020, respectively, and were then stored in HDPE bottles  
249 and sealed with parafilm.

250           Before analysis, all samples were stored at 4 °C in a refrigerator  
251 without evaporation. Soil water had to be extracted from the soil. We used  
252 a cryogenic freezing vacuum extraction system (LI-2000, Beijing Liga  
253 United Technology Co., Ltd., China) to extract soil water, as it can achieve  
254 complete extraction and has a high precision (Li et al., 2016). The test tubes  
255 containing soil samples were installed on the extraction line and frozen  
256 with liquid nitrogen. After 10 min, the line was checked to ensure no leaks.  
257 After it was completely sealed, the larger test tube was heated using a  
258 heating sleeve at 95 °C, and the smaller test tube was frozen with liquid  
259 nitrogen (-196 °C). Due to temperature gradients, water vapor moved from  
260 the larger test tube to the smaller one and condensed into ice. The  
261 extraction process took 2 hr and had an efficiency above 98%. Water



262 samples were analyzed for  $\delta^{18}\text{O}$  and  $^2\text{H}$  through laser absorption  
263 spectroscopy (liquid water isotope analyzer, Los Gatos Research DEL-100,  
264 USA) at the Key Laboratory of Ecohydrology of Inland River Basin,  
265 Northwest Institute of Eco-Environment and Resources, CAS. The results  
266 are reported relative to the Vienna Standard Mean Ocean Water (VSMOW).  
267 Measurement precisions for  $\delta^{18}\text{O}$  and  $\delta^2\text{H}$  were better than 0.5‰ and 0.2 ‰,  
268 respectively.

269 In addition, air temperature, precipitation, evaporation, and ground  
270 temperature in the TRHR were mainly obtained from the China  
271 Meteorological Data Network (<http://data.cma.cn/>). The normalized  
272 Vegetation Index (NDVI) is derived from MODIS data, downloaded from  
273 the NASA website (<https://search.earthdata.nasa.gov/>), with a spatial  
274 resolution of  $0.05^\circ$  and a temporal resolution of 16d, and the data are in  
275 HDF format.

### 276 **2.2.2 Methods**

277 The end member mixing analysis (EMMA) tracer approach has been  
278 widely used for analyzing potential soil water sources (Hooper et al., 1990;  
279 Hooper, 2003; Gibson et al., 2005; Peng et al., 2012; Li et al., 2014; 2020).  
280 The EMMA tracer method assumes that i) the tracer concentration in a  
281 potential water source varies significantly in time and space, ii) the  
282 chemical properties of the selected tracer are stable, and iii) changes occur  
283 as a result of water mixing. Tracer techniques involve graphical analyses



284 in which chemical and isotopic parameters represent the designated end  
285 members. Essentially, the changing composition of the studied water likely  
286 results from the intersections during its passage through each landscape.  
287 Tracers can be used to determine the sources and flow paths. Both the two-  
288 and three-component methods can be described by a uniform equation:

$$289 \quad Q_t = \sum_{m=1}^n Q_m, \quad Q_t C_t^j = \sum_{m=1}^n Q_m C_m^j, \quad j = 1, \dots, k \quad (1)$$

290 where  $Q_t$  is the total runoff discharge,  $Q_m$  is the discharge of component  $m$ ,  
291 and  $C_m^j$  is the tracer  $j$  incorporated in the component  $m$ . In addition, the  
292 global meteoric water line (GMWL), local meteoric water lines (LMWLs),  
293 and evaporation line (LEL) have been used to analyze the relationship  
294 between soil water and other waters in the TRHR.

### 295 **3. Results**

#### 296 **3.1 $\delta^{18}\text{O}$ and $\delta^2\text{H}$ of soil water in different ablation periods**

297 Soil water stable isotopes show significant changes in the early ablation  
298 period (June), the substantial ablation period (August), and the end of  
299 ablation (September). The average value of  $\delta^{18}\text{O}$  and  $\delta\text{D}$  is relatively higher  
300 in June and negative in August. Again it becomes higher in September,  
301 while it exhibits an opposite trend for d-excess (Table.1). Two reasons can  
302 explain this variation: (1) precipitation gradually increases from June,  
303 reaches a maximum in August, and then decreases; (2) the effect of  
304 evapotranspiration on soil water also shows seasonal variations. Soil water



305 stable isotopes in different ablation periods show apparent regional  
306 differences. This reflects that precipitation is the main source of soil water,  
307 and the differences in precipitation stable isotopes are reflected in that of  
308 soil water. The temporal variation of stable isotope in 20–80 cm, similar to  
309 the TRHR, is progressively negative in the surface soil (0–20 cm). This is  
310 due to its high susceptibility to perturbation, and environmental changes  
311 (Table.1). Soil water stable isotopes on the eastern slope were gradually  
312 negative from June to September, while the other slope directions were  
313 consistent with the TRHR (Table.1). Moreover, the strong ablation period  
314 of soil water isotopes in meadow and grassland areas was gradually  
315 negative from the beginning to the end of ablation, while it was  
316 continuously negative in forest areas (Table.1). These facts show the  
317 stochastic nature of soil water changes as the indicators of environmental  
318 changes.

319 As Fig. 3 shows, the slope and intercept for LEL are the lowest in the  
320 heavy ablation period and then in the early ablation period and the end  
321 ablation period, which reflects the seasonal variation of the influence from  
322 evaporation or non-equilibrium dynamic fractionation. In contrast, these  
323 values gradually increase from June to September in the TRHR. The slope  
324 and intercept of LEL for the 0–40 cm layer were the lowest during the  
325 heavy ablation period, while they were relatively high at the beginning  
326 and end of ablation, whereas the slope and intercept of the 40–80 cm layer



327 gradually increased (Fig.4). This reflects that the soil layer above 40 cm is  
328 greatly disturbed by the environment. Its variation is more sensitive to  
329 environmental changes, while the deeper soil layer is relatively stable. For  
330 different altitudes, the slope and intercept of LEL increased continuously  
331 from the beginning to the end of ablation at 3000–3500 m and 5100 m,  
332 while at 3500–4500 m the heavy ablation period was the lowest and the  
333 beginning and end of ablation were relatively high (Table.2). In the  
334 grassland, forest and scrub areas, the slope and intercept of LEL are higher  
335 during the heavy ablation period and lower at the beginning and end of  
336 ablation, while the opposite is evident in the meadow areas (Table.2).  
337 More interestingly, the slope and intercept of LEL on the northern and  
338 eastern slopes are lower during the heavy ablation period and higher at the  
339 beginning and end of the ablation period; on the southern and western  
340 slopes, they gradually increase and reach the maximum at the end of  
341 ablation period (Table.2). These changes again reflect the multiplicity and  
342 complexity of factors influencing soil water, and suggest that conducting  
343 soil water source should be predicated on continuous systematic sampling  
344 at the regional scale.

### 345 **3.2 Relationship between soil water and surface waters in different** 346 **ablation periods**

347 In the study region, the LMWL was  $\delta^2\text{H} = 7.89\delta^{18}\text{O} + 12.43$  ( $R^2 = 0.97$ ;  $N$   
348  $= 375$ ) based on event-level precipitation. As Fig.5 shows, soil water was





349 primarily located on the LWML, suggesting that precipitation was the  
350 major soil water source, and some soil water plotted below the LWML  
351 owing to high evaporation. The  $\delta^{18}\text{O}$  and  $\delta^2\text{H}$  values varied among  
352 precipitation, ground ice, and snow meltwater in the early ablation period.  
353 This suggests that in June, as the permafrost and snow melt, ground ice  
354 meltwater, snow meltwater, and precipitation combine to recharge soil  
355 water, and that snow meltwater recharge is mainly in the area above 4000  
356 m based on sampling during the expedition. In the heavy ablation period,  
357 soil water is located on the LWML in August, with some sampling sites  
358 below it because of stronger evaporation (Fig.5). At this time of year, the  
359 snowpack has melted away, and the ground ice in the active layer is also  
360 melting rapidly, with precipitation and ground ice meltwater recharging the  
361 soil water. Soil water lies above the LWML, and the high slope reflects the  
362 relatively low influence of evaporation in the end ablation period, while  
363 the absence of snow meltwater and the ground ice in the soil has also  
364 melted in areas below 4000 m, so precipitation dominates the soil water  
365 source (Fig.5). These variations reflect seasonal variability in the soil water  
366 sources. They suggest that freeze-thaw cycles are a key influence on soil  
367 water variability.

368 Interestingly, soil water, supra-permafrost, and river water show a  
369 clustered distribution at all ablation stages in the TRHR, reflecting a close  
370 hydraulic connection. Precipitation first recharges soil water due to



371 permafrost distribution, while some soil water transforms into supra-  
372 permafrost water. Then some soil and supra-permafrost water recharge the  
373 runoff, reflecting the uniqueness of the hydrological process in cold  
374 regions. These facts show that various recharge sources with significant  
375 seasonal variations influence soil water sources. The relationship between  
376 soil water and the LWML varied significantly at different altitudes; **the**  
377 **higher the altitude, the lower the left-hand side of LWML above 4000 m**  
378 **in the end ablation period, and vice versa, below 4000 m(Fig.5). Reflecting**  
379 **the variation of soil water sources at different altitudes in the end ablation**  
380 **period, soil water is mainly recharged by precipitation in areas below 4000**  
381 **m, while it is also recharged by ground ice meltwater which is strongly**  
382 **influenced by evaporation, resulting in a relatively positive soil water**  
383 **stable isotope. In the early ablation period, the order of altitude is close to**  
384 **the LWML, and as follows: from 3500–4000 m, 4000–4500 m, above 4500**  
385 **m, and below 3500 m, confirming the variability of soil water sources in**  
386 **different altitudes (Fig.5).** On the one hand, precipitation in the area below  
387 4500 m is primarily liquid, while above the area it is mostly snow, which  
388 is strongly affected by evaporation when the snow melts, resulting in a  
389 relatively positive soil water stable isotope and lower recharge to soil water;  
390 on the other hand, precipitation in June is relatively low, while the  
391 temperature in the lower altitude area rises faster, and evaporation is strong,  
392 which leads to a positive soil water stable isotope. In the heavy ablation

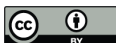

393 period, the distance between the LEL of soil water and the LWML is  
394 comparable at different altitudes, being slightly closer below 3500 m and  
395 slightly further from the 4000–4500 m, reflecting less altitudinal variability  
396 in soil water sources at this time of year, with abundant precipitation  
397 dominating the soil water sources and intense evaporation becoming an  
398 important factor influencing soil water dynamics (Fig.5).

399 The relationship between soil water and the LWML also varied  
400 significantly by vegetation, with grassland being farthest from the LWML,  
401 followed by meadows and frosts at the early and end ablation period. In  
402 contrast, it is farthest for meadows, followed by grassland and forests in a  
403 heavy ablation period (Fig.5). These variations indicate that: (1) forests  
404 have relatively little effect on shallow soil water due to the predominant  
405 use of groundwater and the lower effect of evapotranspiration under the  
406 shade of the trees; (2) under the relatively low precipitation, the low soil  
407 water in grassland, combined with the effect of evapotranspiration, results  
408 in relatively positive soil water stable isotopes; (3) soil water stable  
409 isotopes are positive when the meadow is growing, and evapotranspiration  
410 is intense under the abundant precipitation season. Evapotranspiration  
411 mainly dominates the influence of vegetation on soil water sources. These  
412 changes indicate the stochastic nature of the soil water sources and the  
413 multiplicity of influencing factors.

### 414 3.3 Soil water sources in different ablation periods



415 Based on the EMMA model, there were significant differences in the d-  
416 excess and  $\delta^{18}\text{O}$  concentrations of ground ice, precipitation, snow  
417 meltwater, and soil water during different ablation periods (Fig.6).  
418 Accordingly, these  $\delta^{18}\text{O}$  and d-excess data were selected for analysis  
419 because they could effectively characterize the sources. There were large  
420 spatiotemporal variations in the  $\delta^{18}\text{O}$  and d-excess concentrations. Soil  
421 water was plotted on a triangle spanning the three end members, suggesting  
422 that soil water was a mixture of them in the early ablation period (Fig. 6).  
423 Therefore, precipitation was considered as the first end member, and  
424 ground ice as the second end member, and snow meltwater was considered  
425 as the third end member. Whereas soil water was plotted on a straight line  
426 spanning the two end members, suggesting that soil water was a mixture  
427 of precipitation and ground ice in the heavy and end ablation periods (Fig.  
428 6). ~~The intersection between the LWML and the LEL is considered to be  
429 the isotopic value of the initial water body that recharges the soil water.~~  
430 The intersection between the LWML and the LEL is considered to be the  
431 isotopic value of the initial water body that recharges the soil water, and  
432 the corresponding  $\delta^{18}\text{O}$  and  $\delta^2\text{H}$  are -17.63‰ and -127.61‰, -18.81‰  
433 and -136.94‰, -23.04‰ and -170.36‰ during the early, heavy and end  
434 ablation period in the TRRH, respectively. These values are extremely  
435 close to the corresponding mean monthly precipitation values, reflecting



436 that precipitation is the main source of soil water.

437 Based on the calculation, precipitation, ground ice, and snow  
438 meltwater account for approximately 72%, 20%, and 8% of soil water,  
439 respectively (Fig.7). Moreover, the recharge pattern shows a clear  
440 ~~difference in altitude~~, with no snow meltwater recharge below 4000 m due  
441 to snow melting depletion and a higher snow meltwater recharge at higher  
442 elevations. The maximum of ground ice meltwater recharge occurs at  
443 3500–4000 m and decreases with increasing altitude. This reflects that the  
444 change in altitude of snow and ground ice meltwater is a key factor  
445 affecting the source of soil water during the early ablation period.  
446 Regarding different vegetation types, ground ice meltwater is higher in  
447 meadow areas. In contrast, snow meltwater recharge is relatively high in  
448 grassland areas and mainly in precipitation recharge in forest areas. Ground  
449 ice and snow meltwater recharge is significantly higher on shaded slopes  
450 than on sunny slopes (Fig.7).

451 In the heavy ablation period, precipitation and ground ice accounted  
452 for approximately 90% and 10% of soil water in the TRHR, respectively.  
453 Snow is completely melted at this time of year, and the recharge of soil  
454 water by precipitation decreases with increasing altitude, while ground ice  
455 meltwater gradually increases, ~~with all below 3500 m being recharged by~~  
456 ~~precipitation~~. The forested area is fully recharged by precipitation, while  
457 the meadow area is recharged by ground ice meltwater higher than the



458 grassland area, and the shaded slope is also larger than the sunny slope  
459 (Fig.7).

460 According to the EMMA, precipitation and ground ice accounted for  
461 approximately 94% and 6% of soil water in the TRHR, respectively, during  
462 the end ablation period. All ground ice in soils below 4000 m at this time  
463 of year is ablated away, and all soil water is recharged by precipitation,  
464 with a small amount of ground ice water recharge occurring in the higher  
465 altitude areas. There is only a small amount of recharge from ground ice  
466 meltwater on shady slopes, which is still higher in meadow areas than in  
467 grassland areas (Fig.7).

#### 468 **4. Discussion**

##### 469 **4.1 Influencing factors on soil water sources in different ablation** 470 **periods**

471 Various factors influence soil water sources, including temperature,  
472 precipitation, vegetation, evapotranspiration, and the freeze-thaw cycle. As  
473 mentioned above, soil water is mainly recharged by precipitation and  
474 ground ice meltwater, whereas the amount of ground ice is challenging to  
475 observe, so it is reflected by high or low ground temperature. As  
476 **supplemental Fig.1** shows, spatial correlations of soil moisture with air and  
477 ground temperatures were analyzed during the sampling period.  
478 Interestingly, there was a positive correlation in the early ablation period  
479 because the active layer of permafrost is in the melting process. The higher

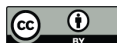

480 the ground temperature, the faster the ground ice melts, causing an increase  
481 in soil water, especially at lower altitudes. The liquid water produced by  
482 ground ice melting and the snow meltwater on the surface would move  
483 down to the upper limit of permafrost, and the precipitation will also move  
484 downward when the active layer completely melted, which would increase  
485 the soil water in the active layer (Jiao et al., 2014). Liquid soil water  
486 increased in the cold months under the increasing soil temperature and  
487 enhancing ground ice melting, while changes in the warm months were the  
488 results of competition between positive precipitation and adverse soil  
489 temperature effects in permafrost regions (Lan et al., 2015). The active  
490 permafrost layer melted slowly at higher altitude regions, and ~~the higher~~  
491 ~~the ground temperature, the more evaporation occurred,~~ causing a decrease  
492 in soil water. Wen et al. (2020) also indicated that temperature increases  
493 reduced the shallow soil water in cold regions. In the heavy ablation period,  
494 soil water exhibits a clear negative correlation with ground temperatures,  
495 with the end of thawing the active permafrost layer and the weakening  
496 effect of permafrost ground ice on soil water, and the higher the  
497 temperature, the stronger the evaporation and lower the soil water. Most  
498 regions display a clear positive correlation in September, with only a few  
499 lower altitude areas showing a negative correlation. Two reasons can  
500 account for it: (1) the top layer of soil at higher altitudes starts to freeze at  
501 night and thaws during the day, thus increasing soil water; (2) soil water at



502 lower altitudes is affected by evaporation and decreases again. These facts  
503 also indicate that changes in freeze-thaw processes are an important  
504 influence on the evolution of soil water. During the thawing phase of the  
505 active permafrost layer, the increase in precipitation or soil water led to an  
506 increase in the thawing rate of frozen soil, accompanied by an increase in  
507 water infiltration as the frozen soil continued to thaw, leading to an increase  
508 in deep soil water and a decrease in surface soil water (Ma et al., 2021).  
509 Under freeze-thaw cycles, the adequate soil water in the root layers of  
510 different alpine meadows was ranked as follows: non-degraded meadow >  
511 moderately-degraded meadow > seriously degraded meadow (Lv et al.,  
512 2022). Xue et al. (2017) found that permafrost degradation significantly  
513 reduced soil water by 4.5–6.1% at a depth of 0–100 cm and increased the  
514 annual mean surface soil temperature by 0.8 °C in the source region of the  
515 Yangtze River.

516 Precipitation infiltration is considered the primary source of soil water  
517 in the active permafrost layer during the freeze-thaw action, which is  
518 considered a major factor and imposes limitations (Cao et al.,2018). In June,  
519 the spatial variation of soil water and precipitation in most regions,  
520 especially at high altitudes, shows a negative correlation; while only a few  
521 low-altitude regions show a positive correlation (supplemental Fig.2). Two  
522 reasons can account for it: 1) on the one hand, this indicates that  
523 precipitation in high altitude regions is mainly in the form of snowfall,





524 which is difficult to recharge soil water directly, and the active permafrost  
525 layer melts slowly, and there is also the phenomenon of alternating  
526 between melting and freezing. So the more the precipitation there is, the  
527 less the soil water changes; 2) on the other hand, all the permafrost in low  
528 altitude regions melts during the **season**, and soil water is mainly recharged  
529 by precipitation, and the more precipitation, the higher the soil water. The  
530 correlation between soil water and precipitation is low during the warm  
531 season in permafrost areas and high in seasonal frozen areas because  
532 permafrost may help maintain soil water stability. In contrast, the  
533 permafrost degradation would reduce the regulating capacity of soil water,  
534 affecting the Tibetan Plateau ecosystem and hydrological cycle (Wu et al.,  
535 2021).

536 **Soil water changes in August exhibit a significant negative**  
537 **correlation with precipitation. During this period, the active layer of**  
538 **permafrost melted. However, the source of soil water was mainly**  
539 **precipitation. More precipitation results in a higher quantity of soil water**  
540 **(supplemental Fig.2).** Most areas show a positive correlation in September.  
541 Only a few high-altitude areas display a negative correlation; due to the  
542 temperature drop, precipitation in high-altitude areas is mainly snowfall,  
543 which has less effect on the recharge of soil water, while the lower altitude  
544 areas still show a positive correlation with rainfall, which directly  
545 recharges soil water. Deng et al. (2020) also indicated that soil water



546 increased with precipitation in most regions of TRHR. Based on the  
547 observation in TRHR, the soil water at 10 cm, 20 cm, and 30 cm increased  
548 by 0.47% /mm, 0.46% /mm, and 0.41% /mm, **when the precipitation**  
549 **increased by 1 mm**, while the soil water at 10 cm, 20 cm and 30 cm  
550 decreased by 3.8%/d, 3.3% /d and 2.3% /d when the number of days  
551 without precipitation increased by 1d, respectively (Li et al., 2022). The  
552 average soil water during 2003–2020 was 20%, increasing at a rate of  
553 0.5%/10a, and its changes were influenced by precipitation and  
554 temperature in TRHR (Chen et al., 2021). In addition, the effect of snow  
555 cover on the soil water thawing up was greater than that of freezing, and  
556 the effect on shallow swamp soils was greater than that of shallow meadow  
557 soils (Chang et al., 2012).

558 Evapotranspiration is the reverse process of soil water recharge. Soil  
559 water, in general, shows a significant negative correlation with  
560 evapotranspiration in June, August, and September in TRHR, indicating  
561 that stronger evapotranspiration will result in less soil water (supplemental  
562 Fig.3). Based on **observation under the simulated warming conditions** in  
563 the Chengduo station in TRHR, the soil temperature increased by 2.50 °C  
564 and 1.36 °C at the soil depth of 0–15 cm and 15–30 cm, respectively, while  
565 the soil water decreased by 0.07% and 0.09% at the soil depth of 0–15 cm  
566 and 15–30 cm, respectively (Yao et al., 2019). Cao and Jin (2021) also  
567 concluded that soil water is negatively correlated with air temperature and



568 positively correlated with precipitation.

#### 569 **4.2 Soil water sources and implications for vegetation restoration**

570 As the limiting factor determining ecosystem stability in cold regions, there  
571 may be complex feedback relationships between vegetation and soil water.  
572 This is of great significance for improving the understanding of the  
573 hydrological process, soil and water conservation, and water resource  
574 utilization. As supplemental Fig.4 shows, the correlation between soil  
575 water and vegetation index in June is positive, and ~~the higher the altitude,~~  
576 ~~the more significant the correlation.~~ On the one hand, the vegetation has  
577 just resumed growth during this period, and the growth is slow with the  
578 relatively weak evapotranspiration, and because the soil is dry after a  
579 freezing period, the vegetation has a higher capacity to hold water; on the  
580 other hand, the active permafrost layer is still in the melting process, and  
581 the melting of ground ice increases the soil water accompanied by the  
582 continuous vegetation growth. In the early stage of vegetation growth, the  
583 upper soil layer has a high water-holding capacity, and the infiltration rate  
584 of precipitation was slow through the surface layer to the deeper layer of  
585 the soil, and there was a more uniform spatial distribution of soil water  
586 with the obvious water-holding function (Wang et al., 2003). Liu et al.  
587 (2021) also thought that the thawing of frozen soil increased the soil water  
588 in the root zone, regulated root respiration, and brought the vegetation into  
589 the growing season. Wei et al. (2022) also indicated that NDVI and surface

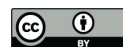

590 soil water were positively correlated in the Loess Plateau with a more  
591 significant mutual feedback relationship.

592 Soil water displayed a negative correlation with vegetation index in most  
593 areas in August, reflecting better vegetation growth and stronger  
594 evapotranspiration, and **lower soil water**, as the active permafrost layer had  
595 all melted by that time of year. Vegetation was in an active growth phase.  
596 **It** showed a negative correlation with the vegetation index at most lower  
597 elevation areas in September, reflecting better vegetation growth, stronger  
598 evapotranspiration, and lower soil water; some higher elevations showed a  
599 positive correlation, reflecting the effects of the freeze-thaw cycle.

600 Soil water is, therefore, the basis of vegetation. The vegetation indices  
601 were closely associated with soil water, which played a key role in the  
602 active layer thickness-vegetation relationship, especially at depths of 30–  
603 40 cm in the northeastern Qinghai-Tibet Plateau (Jin et al., 2020). Thus,  
604 precipitation and vegetation were the main factors that caused soil moisture  
605 variation in summer and autumn, while the soil freeze-thaw cycle was the  
606 main contributing factor in spring (Ma et al., 2021). Based on the  
607 observation in the permafrost region, the mean surface soil water in the  
608 alpine meadow was higher than that in the alpine steppe, while soil water  
609 variability in the cold alpine steppe was larger than that in the alpine  
610 meadow, which decreased with depths (Yang et al., 2011). The soil water  
611 has reduced rapidly after the vegetation degeneration, especially in the soil



612 depth of 0~30 cm, and so climate warming and permafrost degradation  
613 tend to decrease topsoil water in Tibetan Plateau (Wang et al., 2012).  
614 The soil water in the alpine steppe and temperate steppe were mainly  
615 affected by air temperature, and the influence factors for alpine meadow  
616 and shrub were precipitation and NDVI (Zhang et al., 2022). The effect of  
617 different vegetation types on the surface soil water varied widely, and the  
618 higher the vegetation cover, the greater increase in soil water (Ma, 2016).  
619 The surface soil water appeared to be significantly reduced with vegetation  
620 degradation. The more serious the degradation, the more the water loss (up  
621 to 38.6%) (Wang et al., 2010). In Qilian Mountains, the water loss has a  
622 clear positive relationship with soil water and a negative relationship with  
623 soil temperature for shrubland, grassland, and spruce forest (Hu et al.,  
624 2019). Lu et al. (2020) also thought community cover was sensitive to  
625 surface soil water and increased as a function of soil water from 1.1%–10.0%  
626 and gradually tended to saturate. There was a significant positive  
627 correlation between summer NPP and soil water in the watershed, but their  
628 interactions manifested spatial heterogeneity (Yue et al., 2021). Thus, the  
629 high soil water could support more plants with varied vegetation types  
630 (Jiao et al., 2020).

631 As mentioned above, the variability of soil water has further increased  
632 under warming, becoming the most critical factor affecting vegetation  
633 growth, especially as soil water loss will further exacerbate vegetation



634 degradation and pose a great threat to the ecological security in the  
635 “Chinese water tower.” Yue et al. (2022) also found that, under future  
636 climate change, only timely supplementing soil water could promote net  
637 primary productivity growth, improve vegetation productivity, and  
638 effectively restore and protect the ecological environment. Therefore,  
639 active measures should be taken in the following four aspects:

640 (1) Relying on ground-based meteorological observation stations,  
641 hydrological stations, and field observation stations, combined with remote  
642 sensing monitoring, to build a real-time observation network for soil water  
643 variation to provide data support for the formulation of scientific and  
644 reasonable water-soil conservation and vegetation restoration measures.

645 (2) In-depth research on the influence mechanism of soil water on  
646 vegetation growth, construction of vegetation growth model based on soil  
647 water and vegetation carrying capacity, the establishment of the soil water-  
648 vegetation change-vegetation restoration early warning platform, real-time  
649 early warning of vegetation degradation, and provision of the scientific  
650 basis for the restoration of degraded vegetation.

651 (3) The melting of the active permafrost layer and the change of soil  
652 water show seasonality, so the most suitable time for vegetation restoration  
653 should also be determined scientifically. In lower altitude regions,  
654 vegetation enters the growing season in June, and the restoration work  
655 should be implemented from the end of May to promote seed germination.



656 In higher altitude regions, vegetation enters the growing season around the  
657 end of June, and in order to improve the survival rate of vegetation, rapid  
658 seed germination and breeding techniques should be developed. Mature  
659 seedlings should be directly transplanted to make full use of the short  
660 growing season to improve the effectiveness of vegetation restoration.

661 (4) There are significant differences in soil water and its environmental  
662 effects in grasslands, and restoration measures should be taken according  
663 to the different degradation degrees. The integrated pattern of winter rodent  
664 eradication + growing season grazing ban + fertilizer application  
665 technology is for the lightly degraded grasslands, which can significantly  
666 improve the vegetation cover and height of grasses and maintain a stable  
667 increase in soil water. The integrated pattern of winter rodent control +  
668 growing season grazing ban + fertilizer application + no-till replanting is  
669 for the moderately degraded grassland, which not only significantly  
670 increases the cover, height, amount of good forage and above-ground  
671 vegetation of grassland but also promotes the water-holding capacity. The  
672 integrated pattern of winter rodent eradication + growing season grazing  
673 ban + fertilizer application + re-vegetation technology is used in heavily  
674 degraded grasslands to restore vegetation and to ensure that soil water is  
675 stable enough to support vegetation growth.

676 (5) For areas of severe vegetation degradation, the focus is on the  
677 adequate compensation of precipitation in time and space. Changing the



678 micro-topography to collect rainwater in the form of runoff or artificially  
679 produced flow, including fish-scale pit and horizontal ditch technologies,  
680 to achieve the objectives of water storage and moisture conservation,  
681 increase the survival rate of vegetation and improve ecological water use.

## 682 **5. Conclusions**

683 Based on 2600 samples of soil and surface water collected in the Three-  
684 River Headwater Region, the results indicated that  $\delta^{18}\text{O}$  and  $\delta\text{D}$  are  
685 relatively higher in June, then relatively negative in August, and then  
686 higher in September, while it exhibits an opposite trend for d-excess. The  
687 LEL and the relationship between soil water and surface waters in different  
688 ablation periods can confirm this. The intersection between the LWML and  
689 the LEL is considered to be the isotopic value of the initial water body that  
690 recharges the soil water, and the corresponding  $\delta^{18}\text{O}$  and  $\delta^2\text{H}$  are  $-17.63\text{‰}$   
691 and  $-127.61\text{‰}$ ,  $-18.81\text{‰}$  and  $-136.94\text{‰}$ ,  $-23.04\text{‰}$  and  $-170.36\text{‰}$   
692 during the early, heavy and end ablation period in the TRRH, respectively.  
693 These are close to the mean monthly precipitation values. Precipitation,  
694 ground ice, and snow meltwater accounted for approximately 72%, 20%,  
695 and 8% of soil water during the early ablation period, respectively, and it  
696 is with no snow meltwater recharge below 4000 m due to snow melting  
697 depletion. In the heavy ablation period, precipitation and ground ice  
698 contributed to 90% and 10% of soil water, respectively. The precipitation





699 recharge decreases with increasing altitude, while ground ice gradually  
700 increases. According to the EMMA, it accounted for about 94% and 6% of  
701 soil water from precipitation and ground ice, respectively, during the end  
702 ablation period, and the small amount of recharge of ground ice mainly  
703 occurred in the area above 4000 m.

704 In the early ablation period, the higher temperature, the faster the  
705 ground ice melts, causing an increase in soil water, especially at lower  
706 altitudes. With higher temperature, more is the evaporation and lower is  
707 the soil water in the heavy ablation period. Most regions display a clear  
708 positive correlation in September owing to the freeze-thaw cycle. In June,  
709 soil water and precipitation show a negative correlation because there is  
710 mostly snowfall in high-altitude regions, whereas more the precipitation,  
711 the higher the soil water in August and September. However, heavy  
712 evapotranspiration will result in less soil water. It positively correlates with  
713 vegetation in June owing to the melting permafrost active layer, but the  
714 better vegetation growth, the lower soil water in August and September.  
715 However, soil water loss will further exacerbate vegetation degradation  
716 under warming and pose a significant threat to the ecological security of  
717 the “Chinese water tower.” So, it is urgent to build the real-time soil water  
718 observation network, construct the soil water-vegetation change-  
719 vegetation restoration early warning platform, determine the most suitable  
720 time for vegetation restoration, and apply the different soil water

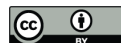

721 conservation and vegetation recovery patterns.

722

723

724

725

726

727

728

729

730

731

732

733

734

735

736

737

738

739

740

741

742

743

744

745



746 **Code/Data availability**

747 The raw/processed data required to reproduce these findings cannot be shared at  
748 this time as the data also forms part of an ongoing study. We will not share our data  
749 until all relevant results are completed.

750

751 **Author Contributions**

752 Zongxing Li led the write-up of the manuscript with significant contribution.  
753 Zongxing Li developed the research and designed the experiments. Juan Gui and  
754 Baijuan Zhang collected the water samples and analysed the data. All authors discussed  
755 the results and contributed to the preparation of the manuscript.

756

757 **Competing interests**

758

759 This manuscript has not been published or presented elsewhere in part or in  
760 entirety and is not under consideration by another journal. We have read and understood  
761 your journal's policies, and we believe that neither the manuscript nor the study violates  
762 any of these. There are no conflicts of interest to declare.

763

764 **Acknowledges**

765 This study was supported by National Nature Science Foundation of and  
766 China(42077187), the Second Tibetan Plateau Scientific Expedition and  
767 Research Program (STEP, Grant No. 2019QZKK0405), the National  
768 Key Research and Development Program of China (Grant No.  
769 2020YFA0607700), the "Western Light"-Key Laboratory Cooperative

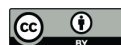

770 Research Cross-Team Project of Chinese Academy of Sciences. We  
771 greatly appreciate suggestions from anonymous referees for the  
772 improvement of our paper. Thanks also to the editorial staff.

773

774

775

776

777

778

779

780

781

782

783

784

785

786

787

788

789

790

791



792 **Reference**

- 793 Alexander Chumbaev. Hydrothermal regime of the urban soils in the cold  
794 period of the hydrological year of Western Siberia (Russia).  
795 International Journal of Biometeorology. 2021, 65: 1741-1750.
- 796 Beyer M, Hamutoko J T, Wanke H, Gaj M, Koeniger P. Examination of  
797 deep root water uptake using anomalies of soil water stable isotopes,  
798 depth-controlled isotopic labeling and mixing models. Journal of  
799 Hydrology, 2018, 566: 122–136.
- 800 Cao R, X M Jin. Distribution Characteristics of Soil Moisture in the Three  
801 Rivers Headwaters Region, China. Journal of Environmental  
802 Informatics Letters, 2021, 6(1): 55-65.
- 803 Cao W, Sheng Y, Wu JC, . Spatial variability and its main controlling  
804 factors of the permafrost soilmoisture on the northern-slope of Bayan  
805 Har Mountains in Qinghai-Tibet Plateau. Journal of Mountain Science,  
806 2017, 14(12): 2406-2419.
- 807 Cao Wei, Sheng Yu, Wu Jichun, Wang Shengting, Ma Shuai. Seasonal  
808 variation of soil hydrological processes of active layer in source  
809 region of the Yellow River. Advances in Water Science, 2018, 29(1):  
810 1-10.
- 811 Chang Juan, Wang Genxu, Gao Yongyong, Wang Yibo. Impacts of snow  
812 cover change on soil water-heat processes of swamp and meadow in  
813 Permafrost Region, Qinghai-Tibetan Plateau [J]. Acta Ecologica



- 814 Sinica, 2012, 32 (23): 7289-7301
- 815 Chen Guoqian, Zhu Cunxiong, Li Suyun, Zhou Bingrong, Li Fu, Cao  
816 Xiaoyun, Zhou Huakun. Remote sensing model constructions and  
817 spatial-temporal changes of soil moisture in the three-river  
818 Headwaters Region. *Acta Agrestia Sinica*, 2021, 29: 199-207.
- 819 Chen Guoqian, Zhu Cunxiong, Li Suyun, Zhou Bingrong, Li Fu, Cao  
820 Xiaoyun, Zhou Huakun. Remote sensing model constructions and  
821 spatial-temporal changes of soil moisture in the Three-river  
822 Headwaters Region. *Remote Sensing of Environment*, 2020, 247:  
823 111727
- 824 Chen Yingying, Kun Yang, Juan Qin, Long Zhao, Wen Tang, Meng Han.  
825 Evaluation of AMSR-E retrievals and GLDAS simulations against  
826 observations of a soil moisture network on the central Tibetan Plateau.  
827 *Journal of Rophysical Research*, 2013, 118: 4466–4475.
- 828 Ma Chunfeng, Li Xin, Wei Long, Wang Weizhen. Multi-Scale Validation  
829 of SMAP Soil Moisture Products over Cold and Arid Regions in  
830 Northwestern China Using Distributed Ground Observation Data.  
831 *Remote Sens.* 2017, 327(09): 1-14.
- 832 Cosh M H, Jackson T J, Bindlish R, Prueger J H. Watershed scale temporal  
833 and spatial stability of soil moisture and its role in validating satellite  
834 estimates. *Remote Sens. Environ*, 2004, 92: 427–435.
- 835 Cuo Lan, Y Zhang, T J Bohn, L Zhao, J Li, Q Liu, B Zhou. Frozen



- 836 soildegradation and its effects on surface hydrology in the northern  
837 Tibetan Plateau. *Journal of Geophysical Research: Atmospheres*,  
838 2015, 120: 8276–8298.
- 839 D Liu , G Wang, R Mei, Z Yu, M Yu. Impact of initial soil moisture  
840 anomalies on climate mean and extremes over Asia. *Journal of*  
841 *Rophysical Research*, 2014, 119: 529-545
- 842 Di Ma, Siqiong Luo, Donglin Guo, Shihua Lyu, Xianhong Meng, Boli  
843 Chen, Lihui Luo. Simulated effect of soil freeze-thaw process on  
844 surface hydrologic and thermal fluxes in frozen ground region of the  
845 Northern Hemisphere[J]. *Sciences in Cold and Arid Regions*, 2021,  
846 13(01): 18-29.
- 847 Dongxia Yue, Yanyan Zhou, Jianjun Guo, Zengzu Chao, Xiaojuan Guo.  
848 Relationship between net primary productivity and soil water content  
849 in the Shule River Basin. *Catena*, 2022, 208: 105770.
- 850 Gaj M, Beyer M, Koeniger P, Wanke H, Hamutoko J, Himmelsbach T. In  
851 situ unsaturated zone water stable isotope ( $^2\text{H}$  and  $^{18}\text{O}$ ) measurements  
852 in semi-arid environments: A soil water balance. *Hydrology and Earth*  
853 *System Sciences*, 2016, 20(2): 715–731.
- 854 Gao B, Yang D, Qin Y, Wang Y, Li H, Zhang Y , Zhang T. Change in frozen  
855 soils and its effect on regional hydrology in the upper Heihe Basin,  
856 the Northeast Qinghai-Tibetan plateau. *Cryosphere Discuss*, 2017,  
857 289: 1–55.

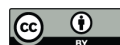

- 858 Geris J, Tetzlaff D, McDonnell J J, Soulsby C. Spatial and temporal  
859 patterns of soil water storage and vegetation water use in humid  
860 Northern catchments. *Science of the Total Environment*, 2017, 595:  
861 486–493.
- 862 Guimin Liu, Xiaoli Wu, Lin Zhao, Tonghua Wu, Guojie Hu, Ren Li,  
863 Yongping Qiao, Xiaodong Wu. Soil water content in permafrost  
864 regions exhibited smaller interannual changes than non-permafrost  
865 regions during 1986–2016 on the Qinghai-Tibetan Plateau. *Catena*,  
866 2021, 207: 1056682.
- 867 Guo L, Zhu B, Jin H, Zhang Y, Min Y, He Y, Shi H. Spatial-Temporal  
868 Variation Characteristics and Influencing Factors of Soil Moisture in  
869 the Yellow River Basin Using ESA CCI SM Products. *Atmosphere*,  
870 2022, 13: 962.
- 871 Huang Qian, Ding Mingjun, Chen Liwen, Xie Kun. variation of moisture  
872 in surface soil of alpine meadow with different degradation degrees in  
873 the Three-river sources region. *Journal of Soil and Water  
874 Conservation*, 2022, 36(1): 189-195.
- 875 Jia Li, Zuhao Zhou, Hao Wang, Jiajia Liu, Yangwen Jia, Peng Hu, Chong-  
876 Yu Xu. Development of WEP-COR model to simulate land surface  
877 water and energy budgets in a cold region. *Hydrology Research*, 2019,  
878 50(1): 99-116.
- 879 Jian Hu, Da Lü, Feixiang Sun, Yihe Lü, Youjun Chen, Qingping Zhou. Soil





- 880 Hydrothermal Characteristics among Three Typical Vegetation Types:  
881 An Eco-Hydrological Analysis in the Qilian Mountains, China. *Water*,  
882 2019, 11: 1277
- 883 Jiao Yongliang, Li Ren, Zhao Lin, Wu Tonghua, Xiao Yao, Hu Guojie, Qiao  
884 Yongping. Processes of soil thawing-freezing and features of soil  
885 moisture migration in the permafrost active layer[J]. *Journal of*  
886 *Glaciology and Geocryology*, 2014, 36 (02): 237-247.
- 887 Lei Jiao, Wenming An, Zongshan Li, Guangyao Gaoc, Cong Wang.  
888 Regional variation in soil water and vegetation characteristics in the  
889 Chinese Loess Plateau. *Ecological Indicators*, 2022, 115: 106399.
- 890 Li Fan, Yan Liangdong, Zhao Mengfan, Zhang Juan. Effect of precipitation  
891 in growing season on soil moisture in the Sanjiangyuan region.  
892 *Journal of Arid Land Resources and Environment*, 2022, 36(6): 121-  
893 128.
- 894 Li Fan, Yan Liangdong, Zhou Mengfan, Zhang Juan. Effect of precipitation  
895 in growing season on soil moisture in the Sanjiangyuan region.  
896 *Journal of Arid Land Resources and Environment*, 2022, 33(6): 121-  
897 128.
- 898 Li Z, Ma J, Song L, Juan Gui, Jian Xue, Baijuan Zhang, Wende Gao,  
899 Zongxing Li. Investigation of soil water hydrological process in the  
900 permafrost active layer using stable isotopes. *Hydrological Processes*.  
901 2020, 34: 2810–2822.



- 902 Liu Zhenhai, Wang Shaoqiang, Chen Bin. Spatial and temporal variations  
903 of frozen ground and its vegetation response in the eastern segment of  
904 China-Mongolia-Russia economic corridor from 2000 to 2015. *Acta*  
905 *Geographica Sinica*, 2021, 76(5): 1231-1244.
- 906 Longwei Xiang, Hansheng Wang, Holger Steffen, Patrick Wu , Lulu  
907 Jia ,Liming Jiang , Qiang Shen. Groundwater storage changes in the  
908 Tibetan Plateau and adjacent areas revealed from GRACE satellite  
909 gravity data. *Earth and Planetary Science Letters*, 2016, 449: 228–239.
- 910 Lu Fengshuai, Ade LuJi, Cheng Yunxiang, *et al.* Relationship between soil  
911 moisture and vegetation coverin Qilian Mountain alpinesteppe. *Acta*  
912 *Prataculturae Sinica*, 2020, 29(11): 23-32.
- 913 Ma Zhiang. Study on Temporal-spatial Pattern and Influencing Factors of  
914 Soil Moisture Based on Remote Sensing in the Source Region of  
915 Yellow River. Master's Thesis, Gansu Agricultural University, 2016.
- 916 Marchionni V, Fatichi S, Tapper N, Walker J, Manoli J, Daly E.  
917 Assessing vegetation response to irrigation strategies and soil  
918 properties in an urban reserve in southeast Australia. *Landscape*  
919 *Urban Plann.* 2021 215: 104-198.
- 920 Martínez García G, Pachepsky Y A, Vereecken, H. Effect of soil hydraulic  
921 properties on the relationship between the spatial mean and variability  
922 of soil moisture. *J. Hydrol*, 2014, 516: 154–160.
- 923 Masato Shinoda, Banzragch Nandintsetseg. Soil moisture and vegetation

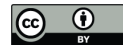

- 924 memories in a cold, arid climate. *Global and Planetary Change*, 2020,  
925 79: 110-117.
- 926 Mingshan Deng, Xianhong Meng, Zhaoguo Li, mYaqiong Lyv, Huajin Lei,  
927 Lin Zhao, Shengnan Zhao, Jun Ge, Hui Jing. Responses of soil  
928 moisture to regional climate change over the Three Rivers Source  
929 Region on the Tibetan Plateau. *International Journal of Climatol.* 2020,  
930 40:2403-2417.
- 931 Mingxia Lv, Yibo Wang, Zeyong Gao. The change process of soil  
932 hydrological properties in the permafrost active layer of the Qinghai–  
933 Tibet Plateau. *Catena*, 2022, 210: 05938.
- 934 Qi W, Feng L, Liu J, Yang H. Snow as an important natural reservoir for  
935 runoff and soil moisture in Northeast China. *Journal of Geophysical*  
936 *Research: Atmospheres*, 2022, 25: 33-86.
- 937 R Cao, X M Jin. Distribution Characteristics of Soil Moisture in the Three  
938 Rivers Headwaters Region, China. *Journal of Environmental*  
939 *Informatics Letters*, 2021, 6(1): 55-65.
- 940 Sazib N, Bolten J, Mladenova I. Exploring spatiotemporal relations  
941 between soil moisture, precipitation, and streamflow for a large set of  
942 watersheds using google earth engine. *Water*, 2020, 12 (5): 13-71.
- 943 Song Lingling, Li Zongjie, Tian Qing, Wang Liefu, He Jing, Yuan Ruifeng,  
944 Gui Juan, Zhang Baijuan, Lv Yuemin. Variation and relationship  
945 between soil moisture and environmental factors in the source region



- 946 of the Yangtze River from 2005 to 2016. *Sciences in Cold and Arid*  
947 *Regions*, 2019, 11(3): 184–193.
- 948 Spennemann P C, Salvia M, Ruscica R C, Sorensson A A, Grings F,  
949 Karszenbaum H. Land-atmosphere interaction patterns in  
950 southeastern South America using satellite products and climate  
951 models. *International Journal of Applied Earth Observation and*  
952 *Geoinformation*, 2018, 64: 96-103.
- 953 Sprenger M, Tetzlaff D, Soulsby C. Soil water stable isotopes reveal  
954 evaporation dynamics at the soil–plant–atmosphere interface of the  
955 critical zone. *Hydrology and Earth System Sciences*, 2017, 21: 3839–  
956 3858.
- 957 Tan H, Liu Z, Rao W, Wei H, Zhang Y, Jin B. Stable isotopes of soil water:  
958 Implications for soil water and shallow groundwater recharge in hill  
959 and gully regions of the loess plateau, China. *Agriculture, Ecosystems*  
960 *& Environment*, 2017, 243: 1–9.
- 961 W Wagner, K Scipal, C Pathe, D Gerten, W Lucht, B Rudolf. Evaluation  
962 of the agreement between the first global remotely sensed soil  
963 moisture data with model and precipitation data. *Journal of*  
964 *Geophysical Research*, 2003, 108(D19): 46-11
- 965 Wang Genxu, Shen Yongping, Qin Ju, Wang Junde. Study on the Influence  
966 of Vegetation Change on Soil Moisture Cycle in Alpine Meadow.  
967 *Journal of Glaciology and Geocryology*, 2003, 25(6): 329-337.



- 968 Wang Yibo, Niu Fujun, Wen Jing, Wu Qingbai, Zhang Wei. Study of the  
969 Soil Hydrological Process in the Source Regions of the Yangtze River,  
970 China. *Advanced Materials Research*, 2012, 518-523: 4266-4272.
- 971 Wang Yibo, Niu Fujun, Wen Jing, Wu Qingbai, Zhang Wei. Study of the  
972 Soil hydrological Process in the Source Regions of the Yangtze River,  
973 China. *Advanced Materials Research Vols*, 2012, 518-523: 4266-4272.
- 974 Wang Yibo, Wang Genxu, Wu Qingbai, Niu Fujun, Chen Huiyan. The  
975 impact of vegetation degeneration of Hydrology features of alpine soil.  
976 *Journal of Glaciology and Geocryology*, 2010, 32(5): 989-998.
- 977 Wen Jing, Qin Ruimin, Zhang Shixiong, Yang Xiaoyan, Xu Manhou.  
978 Effects of long-term warming on the aboveground biomass and  
979 species diversity in an alpine meadow on the Qinghai-Tibetan Plateau  
980 of China. *Journal of Arid Land*, 2020, 12(2): 252–266.
- 981 Wu Xiaoli, Liu Guimin, Li Xinxing, Ji Genghao, Li Lisha, Mao Nan, Xu  
982 Haiyan, Wu Xiaodong. Variation of Soil Moisture and Its Relation  
983 with Precipitation of Permafrost and Seasonally Frozen Soil Regions  
984 on the Qinghai-Tibet Plateau. *Journal of China Hydrology*, 2021,  
985 41(1): 73-79.
- 986 X J Guan<sup>1</sup>, C J Westbrook<sup>1</sup>, C Spence. Shallow soil moisture-ground thaw  
987 interactions and controls-Part 1: Spatiotemporal patterns and  
988 correlations over a subarctic landscape. *Hydrology and Earth System  
989 Sciences*, 2020, 14(07): 1375–1386.



- 990 Xian Xue, Quangang You, Fei Peng, Siyang Dong, Hanchen Duan.  
991 Experimental warming aggravates degradation-induced topsoil  
992 drought in alpine meadows of the Qinghai-Tibetan Plateau. Land  
993 Degrad Develop, 2017, 28: 2343–2353.
- 994 Xiaoting Wei, Qiang Huang, Shengzhi Huang , Guoyong Leng , Yanping  
995 Qu, Mingjiang Deng, Zhiming Han, Jing Zhao, Dong Liu, Qingjun  
996 Bai. Assessing the feedback relationship between vegetation and soil  
997 moisture over the Loess Plateau, China. Ecological Indicators, 2022,  
998 134: 108493.
- 999 Xiaoying Jin, Huijun Jin, Xiaodong Wu, Dongliang Luo , Sheng Yu,  
1000 Xiaoying Li, Ruixia He, QingfengWang, Johannes M. H. Knops.  
1001 Permafrost Degradation Leads to Biomass andSpecies Richness  
1002 Decreases on the NortheasternQinghai-Tibet Plateau. Plants, 2020,  
1003 9(11):14-53.
- 1004 Xue Xian, You Quangang, Peng Fei, Dong Siyang, Duan Hanchen.  
1005 Experimental warming aggravates degradation-induced topsoil  
1006 drought in alpine meadows of the qinghai–tibetan plateau. Land  
1007 Degrad Develop, 2017, 28: 2343–2353.
- 1008 Yao Shiting, Lu Guangxin, Li Xin, Dang Ning, Wang Yingcheng, Zhou Jie  
1009 Dongzhu, Fu Gang, Wang Junbang, Zhou Huakun. Effects of  
1010 simulated warming on soil moisture of alpine meadow at Chengduo  
1011 of Yushu Prefecture, Qinghai province. Ecology and Environmental



- 1012 Sciences, 2019, 28(11): 2176-2184.
- 1013 Yue Dongxia, Mu Xinliang, Zhou Yanyan, Guo Xiaojuan, Wei Lemin, Guo  
1014 Jianjun. Coupling relationship between net primary productivity and  
1015 soil moisture content in the Shule River Basin. Journal of Lanzhou  
1016 University (Natural Sciences), 2021, 57(4): 518-527.
- 1017 Zhang Mengy, Ma Yujun, Xie Ting. Spatial distribution characteristics of  
1018 soil moisture during growing season in Qinghai Lake Basin. Water  
1019 Resources and Hydropower Engineering, 2022, 1-15
- 1020 Zhang Z, Lv Q, Guo Z, Huang X, Hao R. Soil Water Movement of Mining  
1021 Waste Rock and the Effect on Plant Growth in Arid, Cold Regions of  
1022 Xinjiang, China. Water, 2021, 13(09):12-40.
- 1023 Zhaoping Yang, Hua Ouyang, Xianzhou Zhang, Xingliang Xu, Caiping  
1024 Zhou, Wenbin Yang. Spatial variability of soil moisture at typical  
1025 alpine meadow and steppe sites in the Qinghai-Tibetan Plateau  
1026 permafrost region. Environ Earth Sci , 2011, 63: 477–488.
- 1027 Zhe Zhang, Yanping Li, Fei Chen, Michael Barlage, Zhenhua Li.  
1028 Evaluation of convection-permitting WRF CONUS simulation on the  
1029 relationship between soil moisture and heatwaves. Climate Dynamics,  
1030 2020, 55: 35-252.
- 1031  
1032  
1033  
1034



1035 **Tables**

1036 Table.1 The average values of stable isotopes and relationship between

1037  $\delta^{18}\text{O}$  and d-excess for soil waters in TRHR

|                        | Relationship between $\delta^{18}\text{O}$ and d-excess/ $R^2$ | average values for: $\delta^{18}\text{O}$ , $\delta^2\text{H}$ and d-excess in June | average values for: $\delta^{18}\text{O}$ , $\delta^2\text{H}$ and d-excess in August | average values for: $\delta^{18}\text{O}$ , $\delta^2\text{H}$ and d-excess in September |
|------------------------|----------------------------------------------------------------|-------------------------------------------------------------------------------------|---------------------------------------------------------------------------------------|------------------------------------------------------------------------------------------|
| All soil water samples | $Y=-0.16x+3.87$ , $R^2=0.0065$                                 | -12.00; -89.78; 6.30                                                                | -13.26; -100.0; 8.58                                                                  | -13.04; -98.11; 6.24                                                                     |
| 0-20cm                 | $Y=-0.43x+0.98$ , $R^2=0.065$                                  | -11.91; -90.07; 5.18                                                                | -13.24; -101.44; 8.87                                                                 | -14.23; -108.14; 5.71                                                                    |
| 20-40cm                | $Y=-0.4564x+0.7948$ , $R^2=0.0392$                             | -12.07; -90.74; 5.84                                                                | -12.96; -99.01; 11.23                                                                 | -12.42; -92.72; 6.61                                                                     |
| 40-60cm                | $Y=-1.05x-7.33$ , $R^2=0.1667$                                 | -12.38; -90.38; 8.68                                                                | -13.63; -101.46; 5.67                                                                 | -12.33; -92.06; 6.55                                                                     |
| 60-80cm                | $Y=-0.32x+2.5781$ , $R^2=0.0167$                               | -11.36; -83.77; 7.09                                                                | -13.32; -98.51; 4.17                                                                  | -12.42; -92.88; 6.45                                                                     |
| Northern slope         | $Y=-1.1944x-7.3393$ , $R^2=0.1584$                             | -12.33; -90.61; 7.99                                                                | -13.07; -98.34; 12.45                                                                 | -12.05; -91.64; 4.75                                                                     |
| Eastern slope          | $Y=-0.7x-2.2479$ , $R^2=0.0956$                                | -11.31; -85.49; 5.028                                                               | -13.77; -103.422; 6.16                                                                | -12.17; -89.9; 7.47                                                                      |
| Western slope          | $Y=-0.4337x+0.8866$ , $R^2=0.0543$                             | -12.62; -93.63; 7.36                                                                | -12.92; -96.89; 11.99                                                                 | -12.2; -91.5; 6.15                                                                       |
| Grassland              | $Y=-0.4921x-0.5722$ , $R^2=0.0715$                             | -10.39; -77.66; 5.45                                                                | -12.13; -89.28; 27.06                                                                 | -9.62; -71.87; 5.13                                                                      |
| Meadow                 | $Y=-0.6067x+0.8133$ , $R^2=0.0615$                             | -12.15; -90.36; 6.87                                                                | -13.45; -101.94; 5.25                                                                 | -12.82; -96.56; 6.02                                                                     |





|        |                                             |               |          |                              |                                 |
|--------|---------------------------------------------|---------------|----------|------------------------------|---------------------------------|
| Forest | $Y = -1.4013x - 12.706$ ,<br>$R^2 = 0.2283$ | -13.6;<br>5.1 | -103.66; | -13.66; -<br>103.16;<br>5.24 | -15.82;<br>-<br>118.98;<br>7.60 |
|--------|---------------------------------------------|---------------|----------|------------------------------|---------------------------------|

1038

1039 Table.2 The LEL for soil waters in study region

|                          | EL/ R <sup>2</sup> in June                                  | EL/ R <sup>2</sup> in August                               | EL/ R <sup>2</sup> in September                              |
|--------------------------|-------------------------------------------------------------|------------------------------------------------------------|--------------------------------------------------------------|
| <b>2900-3500</b>         | $\delta^2H = 5.7\delta^{18}O - 21.18$ R <sup>2</sup> =0.90  | $\delta^2H = 6.8\delta^{18}O - 7.83$ R <sup>2</sup> =0.95  | $\delta^2H = 7.43\delta^{18}O - 2.59$ R <sup>2</sup> =0.98   |
| <b>3500-4000</b>         | $\delta^2H = 7.58\delta^{18}O - 1.34$ R <sup>2</sup> =0.83  | $\delta^2H = 6.48\delta^{18}O - 16.54$ R <sup>2</sup> =0.9 | $\delta^2H = 7.67\delta^{18}O + 3.1$ R <sup>2</sup> =0.97    |
| <b>4000-4500</b>         | $\delta^2H = 7.27\delta^{18}O - 3.46$ R <sup>2</sup> =0.88  | $\delta^2H = 6.5\delta^{18}O - 15.09$ R <sup>2</sup> =0.93 | $\delta^2H = 7.04\delta^{18}O - 6.8$ R <sup>2</sup> =0.96    |
| <b>nibanshi4500-5100</b> | $\delta^2H = 6.05\delta^{18}O - 12.4$ R <sup>2</sup> =0.85  | $\delta^2H = 6.69\delta^{18}O - 8.68$ R <sup>2</sup> =0.93 | $\delta^2H = 6.9\delta^{18}O - 6.6$ R <sup>2</sup> =0.87     |
| <b>grassland</b>         | $\delta^2H = 6.4\delta^{18}O - 11.07$ R <sup>2</sup> =0.83  | $\delta^2H = 6.62\delta^{18}O - 9.07$ R <sup>2</sup> =0.96 | $\delta^2H = 6.44\delta^{18}O - 9.91$ R <sup>2</sup> =0.92   |
| <b>meadow</b>            | $\delta^2H = 6.55\delta^{18}O - 10.67$ R <sup>2</sup> =0.84 | $\delta^2H = 6.4\delta^{18}O - 15.83$ R <sup>2</sup> =0.90 | $\delta^2H = 7.14\delta^{18}O - 5.05$ R <sup>2</sup> =0.95   |
| <b>forest</b>            | $\delta^2H = 6.97\delta^{18}O - 8.9$ R <sup>2</sup> =0.73   | $\delta^2H = 7.61\delta^{18}O + 0.85$ R <sup>2</sup> =0.97 | $\delta^2H = 7.46\delta^{18}O - 0.97$ R <sup>2</sup> =0.97   |
| <b>Northern slope</b>    | $\delta^2H = 7.33\delta^{18}O - 0.22$ R <sup>2</sup> =0.84  | $\delta^2H = 6.8\delta^{18}O - 9.46$ R <sup>2</sup> =0.91  | $\delta^2H = 6.86\delta^{18}O - 8.95$ R <sup>2</sup> =0.90   |
| <b>Eastern slope</b>     | $\delta^2H = 6.92\delta^{18}O - 8.38$ R <sup>2</sup> =0.88  | $\delta^2H = 6.33\delta^{18}O - 16.9$ R <sup>2</sup> =0.89 | $\delta^2H = 6.78\delta^{18}O - 14.253$ R <sup>2</sup> =0.93 |
| <b>Southern slope</b>    | $\delta^2H = 6.44\delta^{18}O - 13.22$ R <sup>2</sup> =0.81 | $\delta^2H = 6.84\delta^{18}O - 9.28$ R <sup>2</sup> =0.96 | $\delta^2H = 6.8\delta^{18}O - 7.0$ R <sup>2</sup> =0.93     |
| <b>Western slope</b>     | $\delta^2H = 6.14\delta^{18}O - 16.14$ R <sup>2</sup> =0.91 | $\delta^2H = 6.46\delta^{18}O - 13.4$ R <sup>2</sup> =0.92 | $\delta^2H = 7.33\delta^{18}O - 2.07$ R <sup>2</sup> =0.98   |

1040

1041

1042

1043

1044

1045

1046

1047

1048

1049



1050 Figures

1051 Fig.1 The location of Three -River Headwater Region in ecological barriers  
1052 of China(a); distribution map of permafrost and seasonal frozen soil (b),  
1053 soil types (c) and vegetation types (d) in the study region

1054 Fig.2 the work photo for sampling glacier snow meltwater(a), soil in  
1055 grassland(b), soil in meadow (c), supre-permafrost water (d), river water  
1056 (e), tributary water (f), vegetation (g) and soil in forests (h)

1057 Fig.3 Distribution of sampling sites for soils and waters in June (a), August  
1058 (b) and September (c)

1059 Fig.4 Plot of  $\delta D$  versus  $\delta^{18}O$  and LEL for soil water at different soil layers  
1060 on June (a), August (b) and September (c)

1061 Fig.5 Hydraulic connections between soil water and other waters for all  
1062 samples (a), different altitudes (b) and vegetation (c) in June, all  
1063 samples (d), different altitudes (e) and vegetation (f) in August, all  
1064 samples (g), different altitudes (h) and vegetation (i) in September

1065 Fig.6 Three end element diagram in June (a) and Two end element diagram  
1066 in August (b) and September (c) using the mean values of  $\delta^{18}O$  and d-  
1067 excess for soil water

1068 Fig.7 Concept map for contribution from precipitation, snow meltwater  
1069 and ground ice to soil water in the whole study region, different  
1070 altitudes and different vegetation in June (a), August (b) and  
1071 September (c)



1072 Fig.8 Concept diagram for real-time monitoring network for soil water, soil  
1073 water-vegetation change-vegetation restoration early warning platform and  
1074 the different soil water conservation and vegetation restoration patterns in  
1075 Three-River Headwater Region  
1076  
1077  
1078  
1079  
1080  
1081  
1082  
1083  
1084

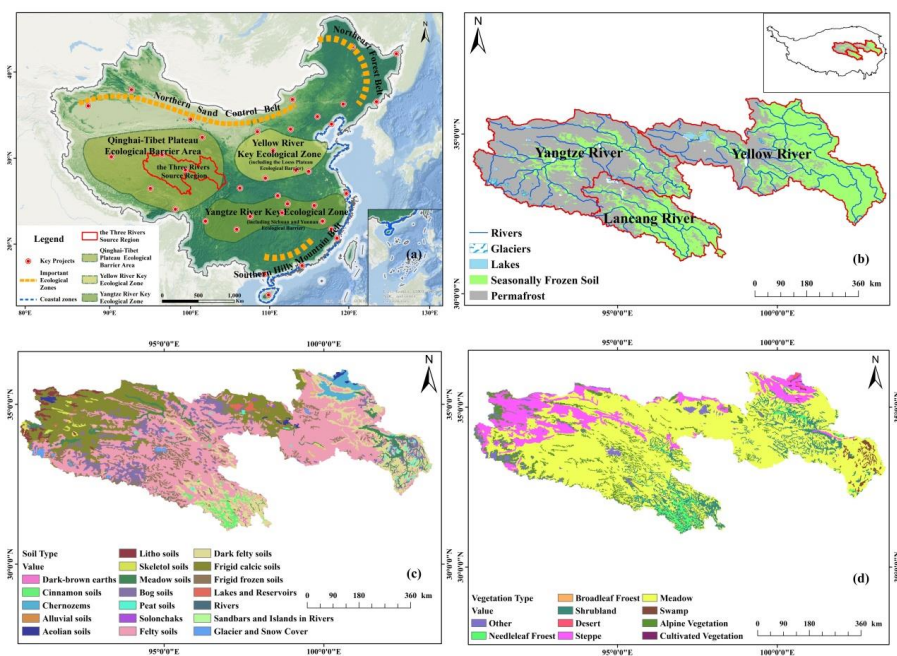

1085

1086

Fig.1

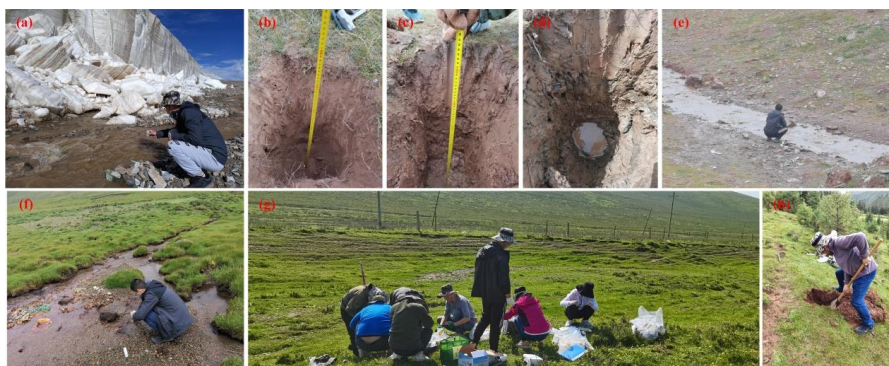

1087

1088

Fig.2

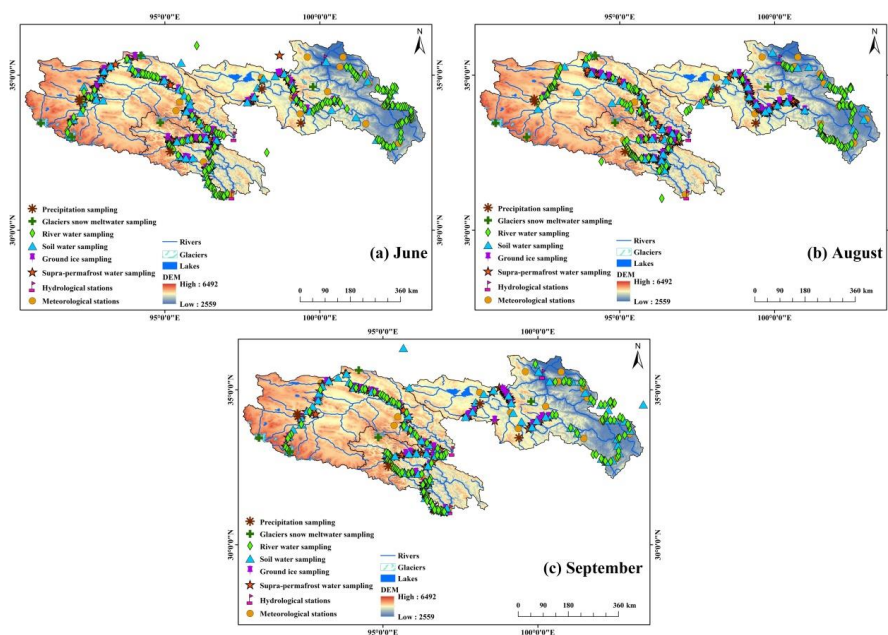

1089  
 1090

Fig.3

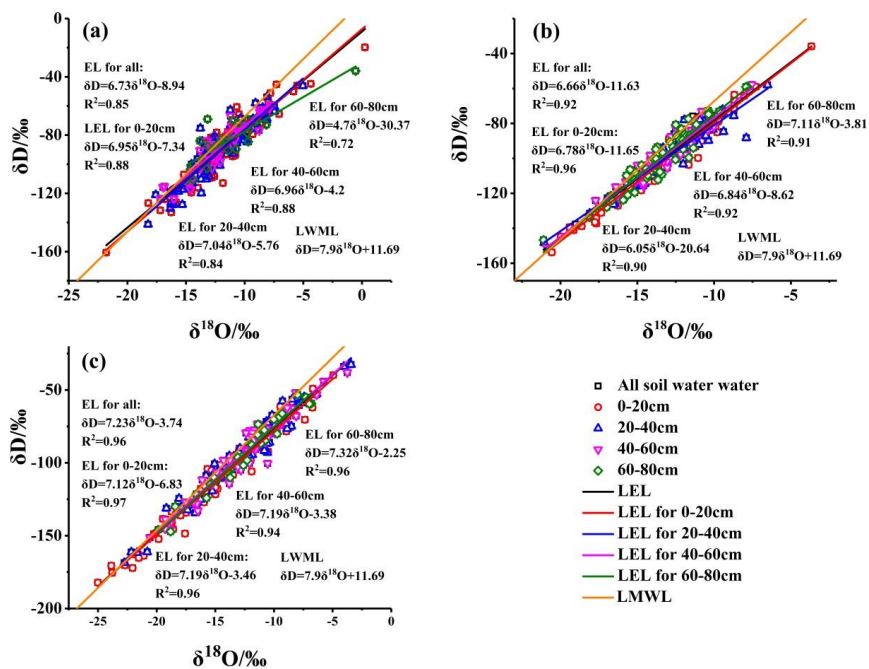

1091  
 1092

Fig.4

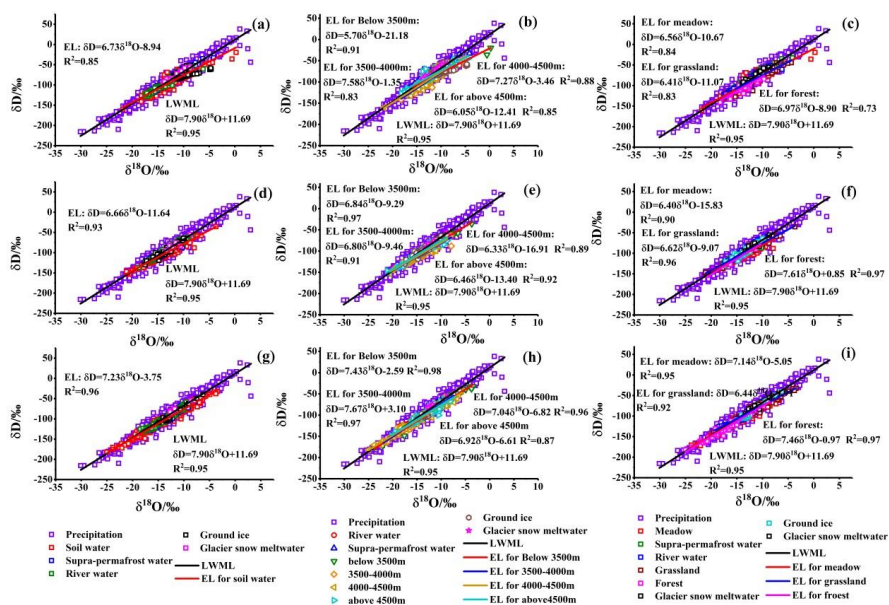

1093  
 1094

Fig.5

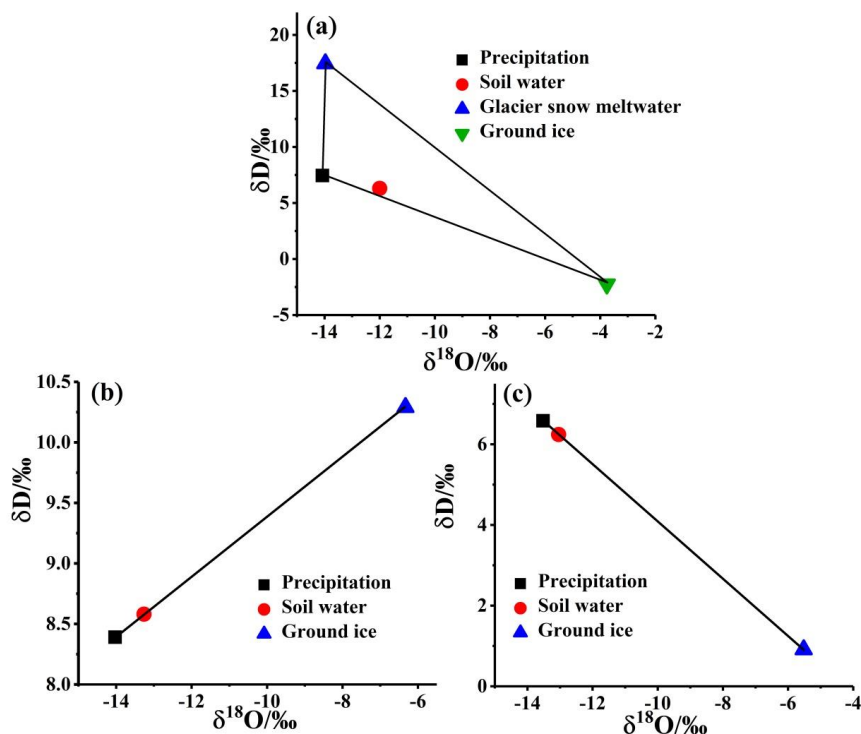

1095  
 1096

Fig.6

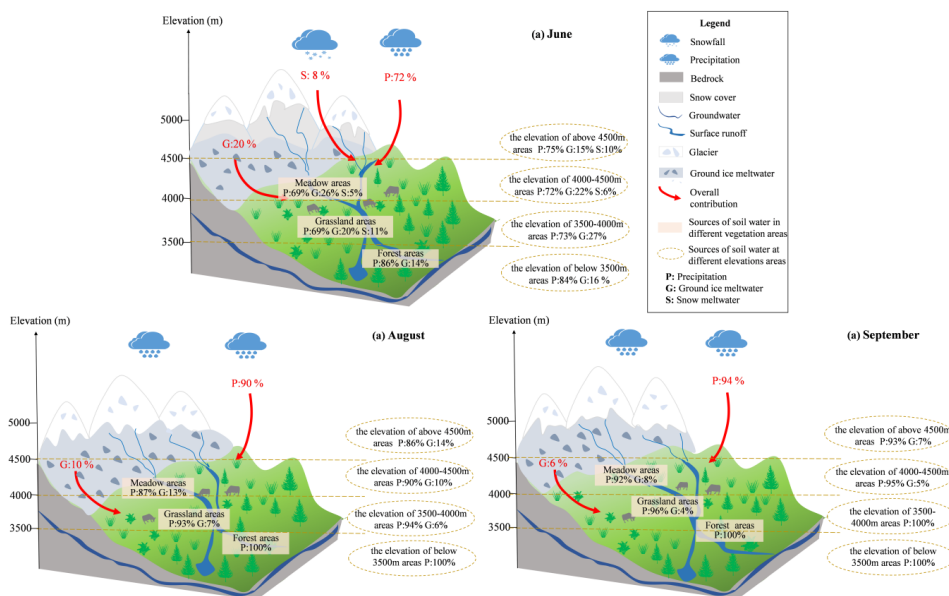

1097  
1098

Fig.7

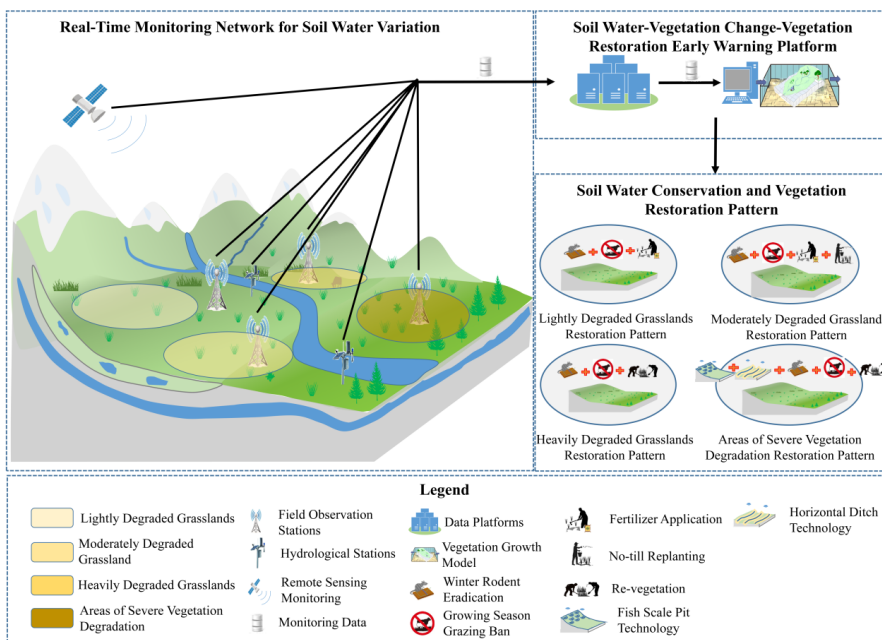

1099  
1100  
1101

Fig.8
